# Supplementary material for: Hepatitis B Virus Status and Clinical Outcomes in IgA Nephropathy
Source: PubMed Central journal article supplement — Kidney Int Rep. 2024 Jan 10;9(4):1057–66. doi: 10.1016/j.ekir.2024.01.009 (PMC11101714; doi:10.1016/j.ekir.2024.01.009), 2024-01-10
Supplement: mmc1.pdf [file mmc1.pdf]

**Table S1.** Demographics and clinical features of patients after 1:4 propensity score matching

| Characteristics                   | Before matching            |                                | <i>p</i> | After matching            |                                | <i>p</i> |
|-----------------------------------|----------------------------|--------------------------------|----------|---------------------------|--------------------------------|----------|
|                                   | No infection<br>(n = 1405) | Chronic infection<br>(n = 132) |          | No infection<br>(n = 500) | Chronic infection<br>(n = 125) |          |
| female, n (%)                     | 697 (49.6)                 | 59 (44.7)                      | 0.313    | 232 (46.4)                | 57 (45.6)                      | 0.800    |
| age (y)                           | 34.3 ± 12.0                | 37.1 ± 10.2                    | 0.008    | 37.3 ± 12.6               | 36.7 ± 10.0                    | 0.357    |
| BMI (kg/m <sup>2</sup> )          | 24.4 ± 4.0                 | 25.1 ± 4.0                     | 0.063    | 25.0 ± 4.2                | 24.9 ± 3.9                     | 0.800    |
| SBP (mmHg)                        | 124.4 ± 15.5               | 124.4 ± 13.5                   | 0.988    | 124.1 ± 15.2              | 124.4 ± 13.4                   | 0.749    |
| DBP (mmHg)                        | 78.7 ± 11.3                | 79.5 ± 10.6                    | 0.477    | 78.9 ± 11.0               | 79.4 ± 10.6                    | 0.431    |
| prodromic infection n (%)         | 467 (33.2)                 | 29 (22)                        | 0.017    | 112 (22.4)                | 29 (23.2)                      | 0.763    |
| gross hematuria n (%)             | 360 (25.6)                 | 21 (15.9)                      | 0.014    | 91 (18.2)                 | 21 (16.8)                      | 0.560    |
| nephrotic syndrome n(%)           | 15 (8.5)                   | 106 (7.6)                      | 0.484    | 42 (8.4)                  | 7 (5.6)                        | 0.083    |
| serum albumin (g/L)               | 37.7 ± 6.1                 | 36.6 ± 5.7                     | 0.052    | 36.8 ± 6.1                | 36.6 ± 5.8                     | 0.588    |
| LDL-C (mmol/L)                    | 2.9 ± 1.2                  | 2.9 ± 1.1                      | 0.891    | 2.9 ± 1.1                 | 2.9 ± 1.1                      | 0.464    |
| total cholesterol (mmol/L)        | 5.1 ± 1.7                  | 5.0 ± 1.3                      | 0.437    | 5.0 ± 1.5                 | 5.0 ± 1.3                      | 0.913    |
| triglycerides (mmol/L)            | 1.7 (1.1, 2.5)             | 1.7 (1.1, 2.5)                 | 0.966    | 1.6 (1.1, 2.3)            | 1.7 (1.1, 2.5)                 | 0.197    |
| plasma IgA (g/L)                  | 3.1 (2.4, 3.9)             | 3.1 (2.5, 4.0)                 | 0.537    | 3.2 (2.5, 3.9)            | 3.0 (2.5, 3.9)                 | 0.611    |
| C3 (g/L)                          | 1.0 (0.9, 1.2)             | 0.9 (0.8, 1.1)                 | < 0.001  | 1.0 (0.8, 1.1)            | 0.9 (0.8, 1.1)                 | 0.364    |
| proteinuria (g/24h)               | 1.3 (0.7, 2.6)             | 1.3 (0.6, 2.4)                 | 0.723    | 1.2 (0.6, 2.4)            | 1.3 (0.6, 2.5)                 | 0.505    |
| ACR (mg/g)                        | 706.5 (330.6, 1454.7)      | 759.4 (312.4, 1395.8)          | 0.994    | 705.8 (352.4, 1428.3)     | 771.3 (330.3, 1416.3)          | 0.570    |
| eGFR (mL/min/1.73m <sup>2</sup> ) | 84.2 (55.4, 107.0)         | 80.0 (58.9, 100.5)             | 0.206    | 3.0 (2.5, 3.9)            | 0.611                          | 0.259    |
| serum creatinine (mmol/L)         | 107.5 ± 57.1               | 107.5 ± 50.4                   | 0.994    | 107.5 ± 47.3              | 107.3 ± 51.2                   | 0.940    |
| Uric Acid                         | 377.1 ± 104.2              | 384.5 ± 101.8                  | 0.433    | 382.7 ± 104.3             | 385.7 ± 101.9                  | 0.646    |

Abbreviations: ACR:albumin-to-creatinine ratio; URBC:Urine red blood cell count;eGFR: estimated glomerular filtration rate; LDL-C:low-density lipoprotein cholesterol.

**Figure S1.** Comparison of Kaplan-Meier renal survival curves for IgAN with HBV, presence of replicative HBV, and without replicative HBV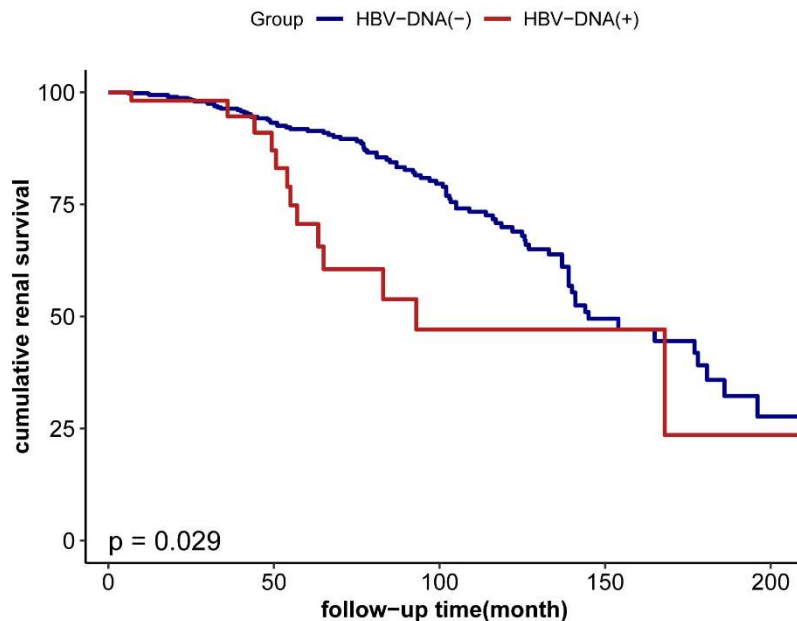

## STROBE Statement.

|                              | Item No | Recommendation                                                                                                                                                                                    | Page No   |
|------------------------------|---------|---------------------------------------------------------------------------------------------------------------------------------------------------------------------------------------------------|-----------|
| <b>Title and abstract</b>    | 1       | (a) Indicate the study's design with a commonly used term in the title or the abstract                                                                                                            | 1         |
|                              |         | (b) Provide in the abstract an informative and balanced summary of what was done and what was found                                                                                               | 2-3       |
| <b>Introduction</b>          |         |                                                                                                                                                                                                   |           |
| Background/rationale         | 2       | Explain the scientific background and rationale for the investigation being reported                                                                                                              | 3-4       |
| Objectives                   | 3       | State specific objectives, including any prespecified hypotheses                                                                                                                                  | 4         |
| <b>Methods</b>               |         |                                                                                                                                                                                                   |           |
| Study design                 | 4       | Present key elements of study design early in the paper                                                                                                                                           | 4         |
| Setting                      | 5       | Describe the setting, locations, and relevant dates, including periods of recruitment, exposure, follow-up, and data collection                                                                   | 4,        |
| Participants                 | 6       | (a) Give the eligibility criteria, and the sources and methods of selection of participants. Describe methods of follow-up                                                                        | 4-5       |
|                              |         | (b) For matched studies, give matching criteria and number of exposed and unexposed                                                                                                               | 4, Fig.1  |
| Variables                    | 7       | Clearly define all outcomes, exposures, predictors, potential confounders, and effect modifiers. Give diagnostic criteria, if applicable                                                          | 6         |
| Data sources/<br>measurement | 8       | For each variable of interest, give sources of data and details of methods of assessment (measurement). Describe comparability of assessment methods if there is more than one group              | 5         |
| Bias                         | 9       | Describe any efforts to address potential sources of bias                                                                                                                                         | 7         |
| Study size                   | 10      | Explain how the study size was arrived at                                                                                                                                                         | NA        |
| Quantitative variables       | 11      | Explain how quantitative variables were handled in the analyses. If applicable, describe which groupings were chosen and why                                                                      | 7         |
| Statistical methods          | 12      | (a) Describe all statistical methods, including those used to control for confounding                                                                                                             | 7         |
|                              |         | (b) Describe any methods used to examine subgroups and interactions                                                                                                                               | 7         |
|                              |         | (c) Explain how missing data were addressed                                                                                                                                                       | 7         |
|                              |         | (d) If applicable, explain how loss to follow-up was addressed                                                                                                                                    | NA        |
|                              |         | (e) Describe any sensitivity analyses                                                                                                                                                             | 7         |
| <b>Results</b>               |         |                                                                                                                                                                                                   |           |
| Participants                 | 13      | (a) Report numbers of individuals at each stage of study—eg numbers potentially eligible, examined for eligibility, confirmed eligible, included in the study, completing follow-up, and analysed | 7         |
|                              |         | (b) Give reasons for non-participation at each stage                                                                                                                                              | 7         |
|                              |         | (c) Consider use of a flow diagram                                                                                                                                                                | Fig.1     |
| Descriptive data             | 14      | (a) Give characteristics of study participants (eg demographic, clinical, social) and information on exposures and potential confounders                                                          | 8, Table1 |
|                              |         | (b) Indicate number of participants with missing data for each variable of interest                                                                                                               | Table1    |
|                              |         | (c) Summarise follow-up time (eg, average and total amount)                                                                                                                                       | 9         |
| Outcome data                 | 15      | Report numbers of outcome events or summary measures over time                                                                                                                                    | 9         |

|                   |    |                                                                                                                                                                                                                                                                                                                                                                                                               |                                     |
|-------------------|----|---------------------------------------------------------------------------------------------------------------------------------------------------------------------------------------------------------------------------------------------------------------------------------------------------------------------------------------------------------------------------------------------------------------|-------------------------------------|
| Main results      | 16 | (a) Give unadjusted estimates and, if applicable, confounder-adjusted estimates and their precision (eg, 95% confidence interval). Make clear which confounders were adjusted for and why they were included<br>(b) Report category boundaries when continuous variables were categorized<br>(c) If relevant, consider translating estimates of relative risk into absolute risk for a meaningful time period | 9,Figure2<br>Table2<br><br>NA<br>NA |
| Other analyses    | 17 | Report other analyses done—eg analyses of subgroups and interactions, and sensitivity analyses                                                                                                                                                                                                                                                                                                                | 9-10<br>Table3,<br>Figure3          |
| Discussion        |    |                                                                                                                                                                                                                                                                                                                                                                                                               |                                     |
| Key results       | 18 | Summarise key results with reference to study objectives                                                                                                                                                                                                                                                                                                                                                      | 12                                  |
| Limitations       | 19 | Discuss limitations of the study, taking into account sources of potential bias or imprecision. Discuss both direction and magnitude of any potential bias                                                                                                                                                                                                                                                    | 15-16                               |
| Interpretation    | 20 | Give a cautious overall interpretation of results considering objectives, limitations, multiplicity of analyses, results from similar studies, and other relevant evidence                                                                                                                                                                                                                                    | 12-15                               |
| Generalisability  | 21 | Discuss the generalisability (external validity) of the study results                                                                                                                                                                                                                                                                                                                                         | 16                                  |
| Other information |    |                                                                                                                                                                                                                                                                                                                                                                                                               |                                     |
| Funding           | 22 | Give the source of funding and the role of the funders for the present study and, if applicable, for the original study on which the present article is based                                                                                                                                                                                                                                                 | 17                                  |
